# Supplementary material for: Glycoside Hydrolase (GH) 45 and 5 Candidate Cellulases in Aphelenchoides besseyi Isolated from Bird’s-Nest Fern
Source: PubMed Central journal article supplement (PMC4938546; doi:10.1371/journal.pone.0158663), 2016-07-08
Supplement: pone.0158663.s002.pdf [file pone.0158663.s002.pdf]

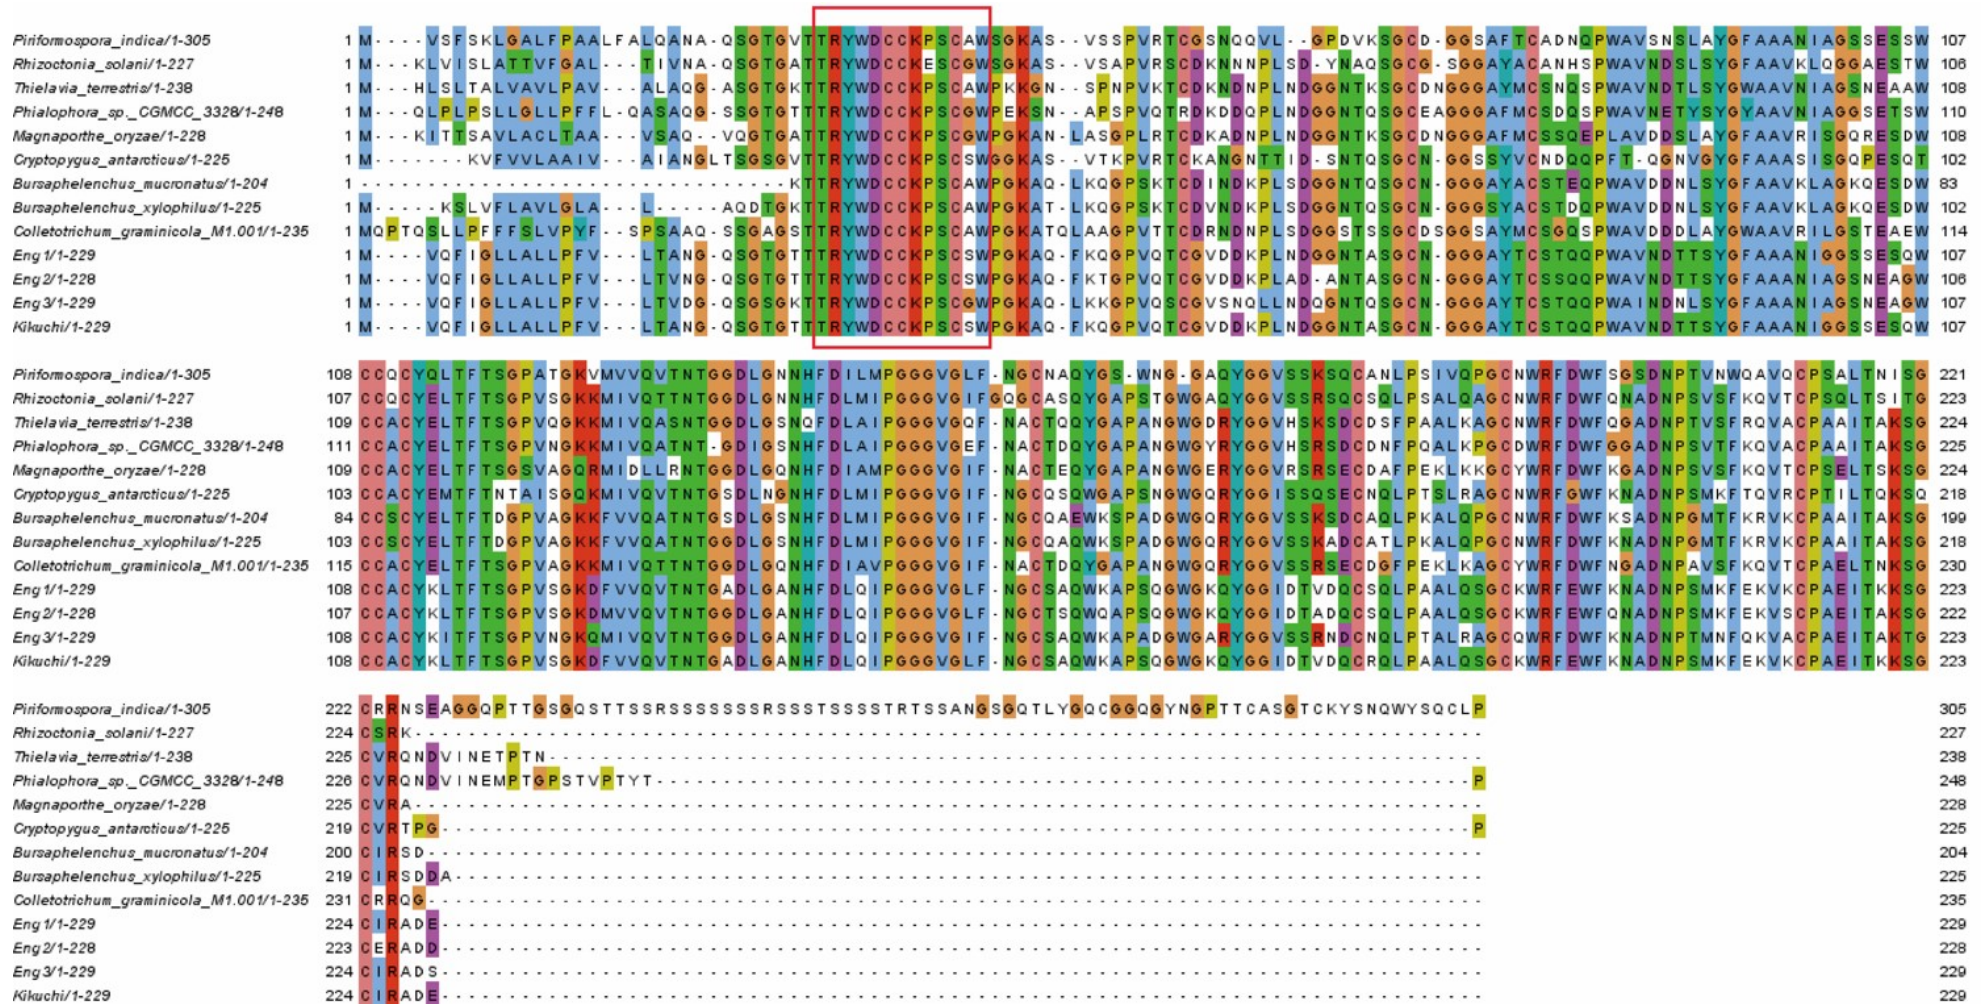

**S2 Fig.** Alignment of predicted GH45 amino acid sequences from *Aphelenchoides besseyi* Abe GH45-1, Abe GH45-2 and Abe GH45-3 with GH45 proteins from other *A. besseyi* [1].

## Reference:

1. Kikuchi T, Helder J, Cock PJA, Jones JT. Characterisation of the transcriptome of *Aphelenchoides besseyi* and identification of a GHF 45 cellulase. *Nematology*. 2014;16(1):99-107. doi: 10.1163/15685411-00002748.
