# Supplementary material for: Glycoside Hydrolase (GH) 45 and 5 Candidate Cellulases in Aphelenchoides besseyi Isolated from Bird’s-Nest Fern
Source: PubMed Central journal article supplement (PMC4938546; doi:10.1371/journal.pone.0158663), 2016-07-08
Supplement: pone.0158663.s003.pdf [file pone.0158663.s003.pdf]

SignalP-4.1 prediction (euk networks): Fm

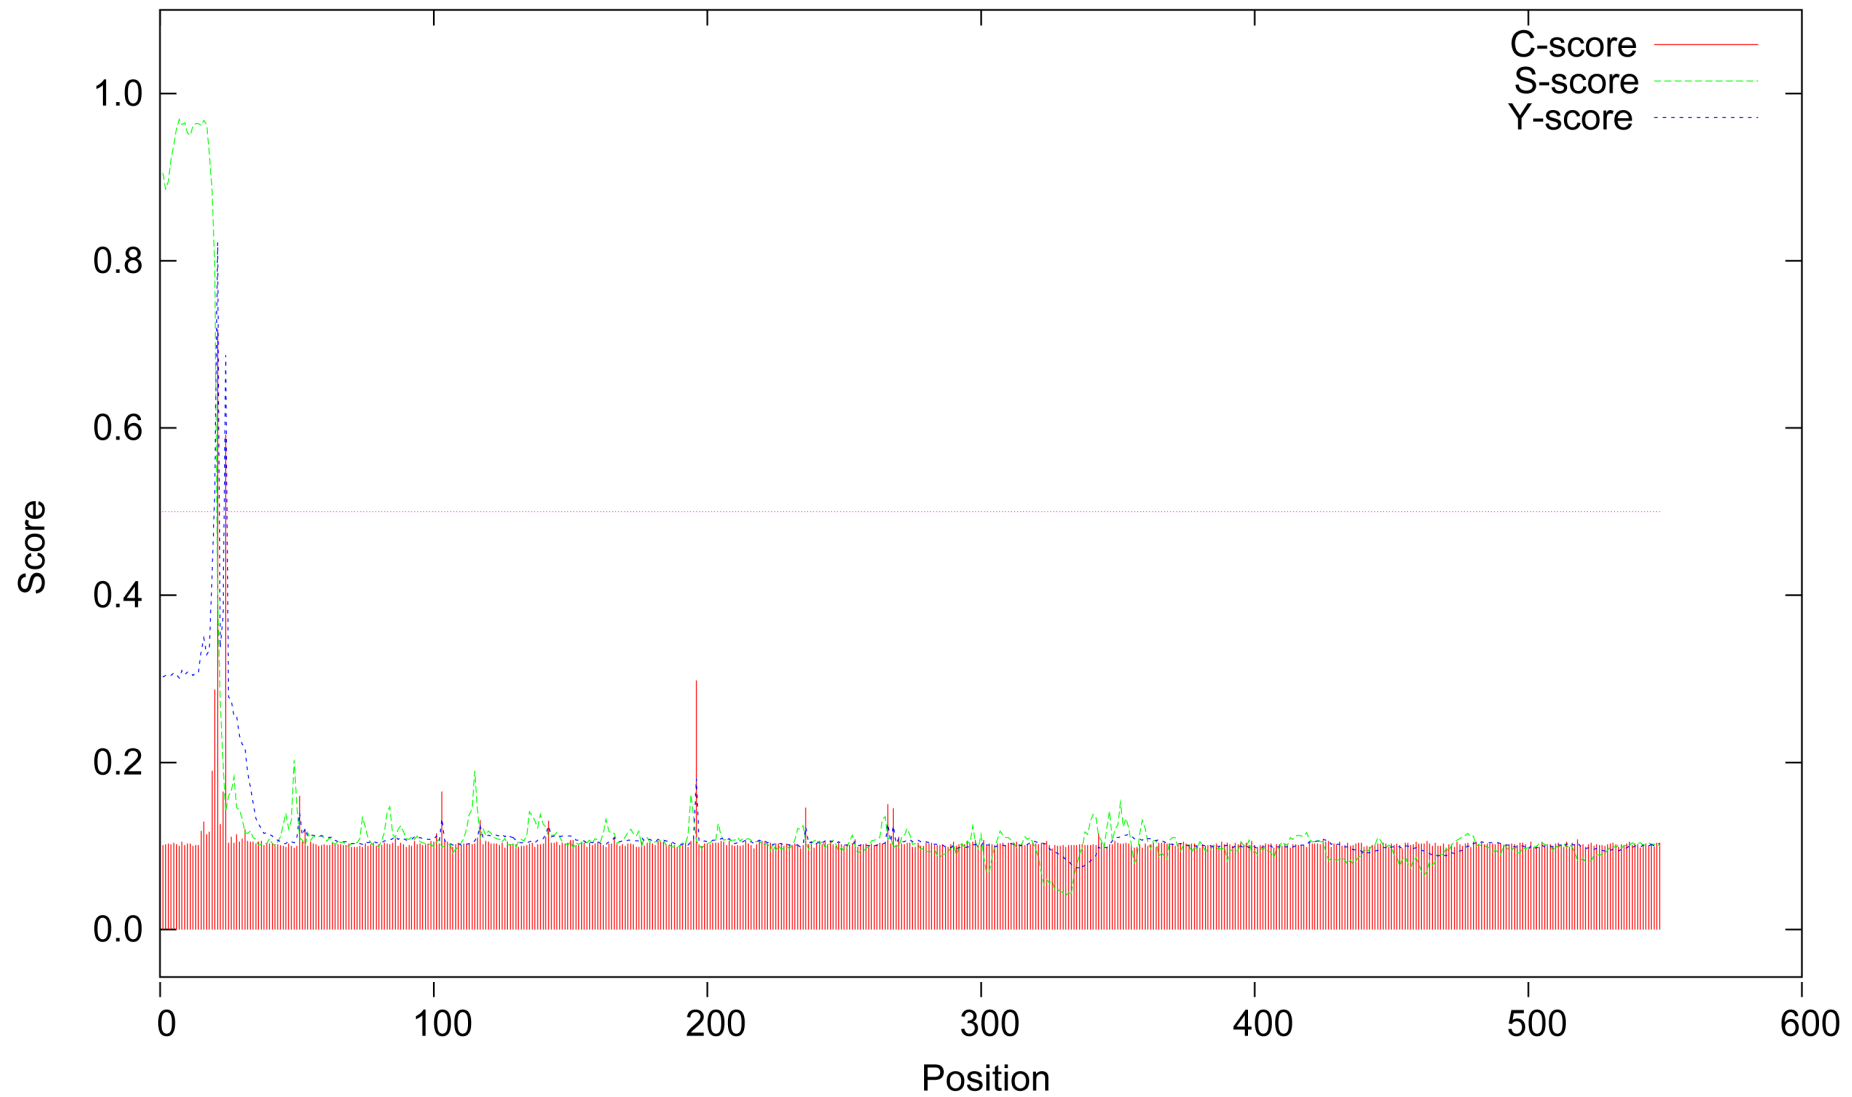

**S3 Fig. SignalP output of the Abe GH5-1 protein sequence. According to the score distribution, only one signal peptide can be detected in the Abe GH5-1 protein.**
