# Supplementary material for: Glycoside Hydrolase (GH) 45 and 5 Candidate Cellulases in Aphelenchoides besseyi Isolated from Bird’s-Nest Fern
Source: PubMed Central journal article supplement (PMC4938546; doi:10.1371/journal.pone.0158663), 2016-07-08
Supplement: pone.0158663.s004.pdf [file pone.0158663.s004.pdf]

W N \* C Y K R L R E G C G M \* N G R R L F1  
 G T N A T N V Y E K G V A C K T D E D C F2  
 E L M L Q T S T R R V W H V K R T K I A F3  
 1 TGGAACTAATGCTACAAACGTCTACGAGAAGGGTGGCATGTAAAACGGACGAAAGATTG 60  
 -----|-----|-----|-----|-----|-----|

H N V S S K M R T S V G F V C V E I A A F1  
 T T Y P A K C E P Q W G L C V L K S Q P F2  
 Q R I Q Q N A N L S G V C V C \* N R S L F3  
 61 CACAACGTATCCAGCAAAATGCGAACCTCAGTGGGGTTTGTGTGTTGAAATCGACGCC 120  
 -----|-----|-----|-----|-----|-----|

S S L R S V V L S R I E L D G R K Q S I F1  
 P A Y G R L S Y R G L N L T G E N N Q S F2  
 Q P T V G C P I A D \* T \* R A K T I N R F3  
 121 TCCAGCCTACGGTCGGTTGTCTATCGCGGATTGAACGTGACGGGCGAAAACAATCAATC 180  
 -----|-----|-----|-----|-----|-----|

G S S S R N V S V R H Q Q W R W N T V L F1  
 V A L H G M C L F G T N N G D G I P F Y F2  
 \* L F T E C V C S A P T M A M E Y R F T F3  
 181 GGTAGCTTTCACGGAATGTGCTGTTCGGCACCAACAATGGCGATGGAATACCGTTTTTA 240  
 -----|-----|-----|-----|-----|-----|

R A V S N P T T E M Q L E Y E R L S C C F1  
 V P S A I Q Q L K C N W N T N A F R A V F2  
 C R Q Q S N N \* N A I G I R T P F V L S F3  
 241 CGTGCCGTACGCAATCCAACAACCTGAAATGCAATGGAATACGAACGCCCTTCGTGCTGT 300  
 -----|-----|-----|-----|-----|-----|

L G Y R K W S G W R L H Y D R T \* L P K F1  
 L D T G N G A D G G Y I M T E R D F P N F2  
 W I Q E M E R M A V T L \* P N V T S Q T F3  
 301 CTTGGATACGGAATGGAGCGGATGGCGTTACATTATGACCGAACGTGACTTCCCAA 360  
 -----|-----|-----|-----|-----|-----|

Q E T R Q I S F G Y C D \* G S N \* I R N F1  
 K K H D K Y R L D T V I K A A I E F G M F2  
 R N T T N I V W I L \* L R Q Q L N S E C F3  
 361 CAAGAAACACGACAAATATCGTTTGGATACTGTGATTAAGGCAAGCAATGAATTCGGA 420  
 -----|-----|-----|-----|-----|-----|

V R D C \* L A R N C R T N R S V Q T S S F1  
 Y V I V D W H G I A G Q I A L Y K L Q A F2  
 T \* L L I G T E L Q D K S L C T N F K L F3  
 421 GTACGTGATTTGATGGCACGGAATTCGAGGACAAATCGCTCTGTACAAACTCAAGC 480  
 -----|-----|-----|-----|-----|-----|

Y C I F F V C V R T L R N V S A Y A L R F1  
 T A Y F S Y V S E R F G M F P H M L Y E F2  
 L H I F R M C P N A S E C F R I C S T R F3  
 481 TACTGCATATTTTCGTATGTGTCGCAACGCTTCGGAATGTTCCGCATATGCTCTACGA 540  
 -----|-----|-----|-----|-----|-----|

D F Q R T V Q F D V D T I P Q K L S L D F1  
 T F N E P Y N S T W T P F L K N Y H L T F2  
 L S T N R T I R R G H H S S K T I T \* Q F3  
 541 GACTTTCAGCAACCGTACAATTCGACGTGGACACCATTCTCAAAAATATCACTTGAC 600  
 -----|-----|-----|-----|-----|-----|

N D Q C N S C F \* Q K K R Y Y C F A S H F1  
 M I N A I R A F D K K N V I I V S P P M F2  
 \* S M Q E V L L L T K K T L L L L F R L P W F3  
 601 AATGATCAATGCAATTCGTGCTTTTGACAAAAAAGCTTATTATTGTTTCGCCTCCCAT 660  
 -----|-----|-----|-----|-----|-----|

G G L P K K R Y P N \* K S D Y W T C Q H F1  
 G D Y P R N D T P T E S P I T G H V N T F2  
 G T T Q E T I P Q L K V R L L D M S T S F3  
 661 GGGGGACTACCAAGAAACGATACCCAATTGAAAGTCCGATTACTGGACATGTCAACAT 720  
 -----|-----|-----|-----|-----|-----|

R L H Q T F L R R F S Q V E F A I Q S S F1  
 A Y T K H F Y A A S H K L N S Q Y N P Q F2  
 L T P N I S T P L L L T S \* I R N T I L R F3  
 721 CGCTTACACCAACATTTCTACGCCGTTCTCACAAGTTGAATTCGCAATACAATCCTCA 780  
 -----|-----|-----|-----|-----|-----|

E V S \* C W T S F I C N R I R N H R S Y F1  
 K Y L D A G L P L F V T E Y G T T D H T F2  
 S I L M L D F L Y L \* P N T E P P I I Q F3  
 781 GAAGTATCTTGATGCTGGACTTCCTTTATTGTAACCGAATACGGAAACCCGATCATA 840  
 -----|-----|-----|-----|-----|-----|

R T N R L R C S G N A K M V G L L G R E F1  
 G R T G Y D A V E M Q K W W D Y L D A N F2  
 D E Q A T M Q W K C K N G G I T W T R I F3  
 841 AGGACGAACAGGCTACGATGCAAGTGAATAATGGTGGGATTACTTGGACGCGAA 900  
 -----|-----|-----|-----|-----|-----|

Q D L L F Q L G S \* E C R R T T P H V L F1  
 K I S Y F N W A L E N A G E Q R H M C S F2  
 R S P I S I G L L R M P A N N A T C A L F3  
 901 CAAGATCTCCTATTTCAATGGGCTCTTGAGAAATGCCGGCAACACGCCCATGTGCTC 960  
 -----|-----|-----|-----|-----|-----|

C V S E \* N S S I G H E S R F E I D D F F1  
 A L V N K T A V S D M S L D S K L T T S F2  
 R \* \* I K Q Q Y R T \* V S I R N \* R L R F3  
 961 TCGCTTAGTGAATAAACAGCAGTATCGGACATGAGTCTCGAATTCGAAATGACGACTTC 1020  
 -----|-----|-----|-----|-----|-----|

G K I G Q D T L Q E S K Q R S Q L L S S F1  
 G R L V K T H Y K N Q N N G V S C \* A R F2  
 E D W S R H T T R I K T T E S V V K L V F3  
 1021 GGGAAAGATGGTCAAGACACTACAAGAATCAAAAACAGGAGTCAGTGTGTTAAGCTCG 1080  
 -----|-----|-----|-----|-----|-----|

L K \* S V F1  
 \* N D Q S F2  
 K M I S X F3  
 1081 TTAATAATGATCAGTC 1095  
 -----|-----|

pfam domain PF00150

signalpeptide

putative peptides in frame 1

putative peptides in frame 2

putative peptides in frame 3

**S4 Fig. Hypothetical proteins translated from the partial *Abe GH5-1* cDNA sequence.** To understand whether the *Abe GH5-1* protein can be produced without SCP-like domain, we computationally generated incomplete proteins by excluding a 5' region of two exons from the *GH5* cDNA sequence, which covered the coding region of signal peptide and SCP-like domain. Using the website tool EMBOSS sixpack [1], the incomplete DNA sequence was translated into protein sequences with different open reading frames. Signal peptides and pfam domains of the proteins were detected using SignalP (v4.1 [2]) and pfam\_scan.pl (version 1.5 [3]). Our data show that no single protein containing both signal peptide and *GH5* domain can be translated from our *Abe GH5-1* cDNA sequence once the 5' region was not available.

**Reference:**

- 1. Rice P, Longden I, Bleasby A. EMBOSS: the European molecular biology open software suite. Trends in genetics. 2000;16(6):276-7.**
- 2. Petersen TN, Brunak S, von Heijne G, Nielsen H. SignalP 4.0: discriminating signal peptides from transmembrane regions. Nat Methods. 2011;8(10):785-6. doi: 10.1038/nmeth.1701. PubMed PMID: 21959131.**
- 3. Finn RD, Bateman A, Clements J, Coggill P, Eberhardt RY, Eddy SR, et al. Pfam: the protein families database. Nucleic acids research. 2013:gkt1223.**
