# Supplementary material for: Glycoside Hydrolase (GH) 45 and 5 Candidate Cellulases in Aphelenchoides besseyi Isolated from Bird’s-Nest Fern
Source: PubMed Central journal article supplement (PMC4938546; doi:10.1371/journal.pone.0158663), 2016-07-08
Supplement: pone.0158663.s005.pdf [file pone.0158663.s005.pdf]

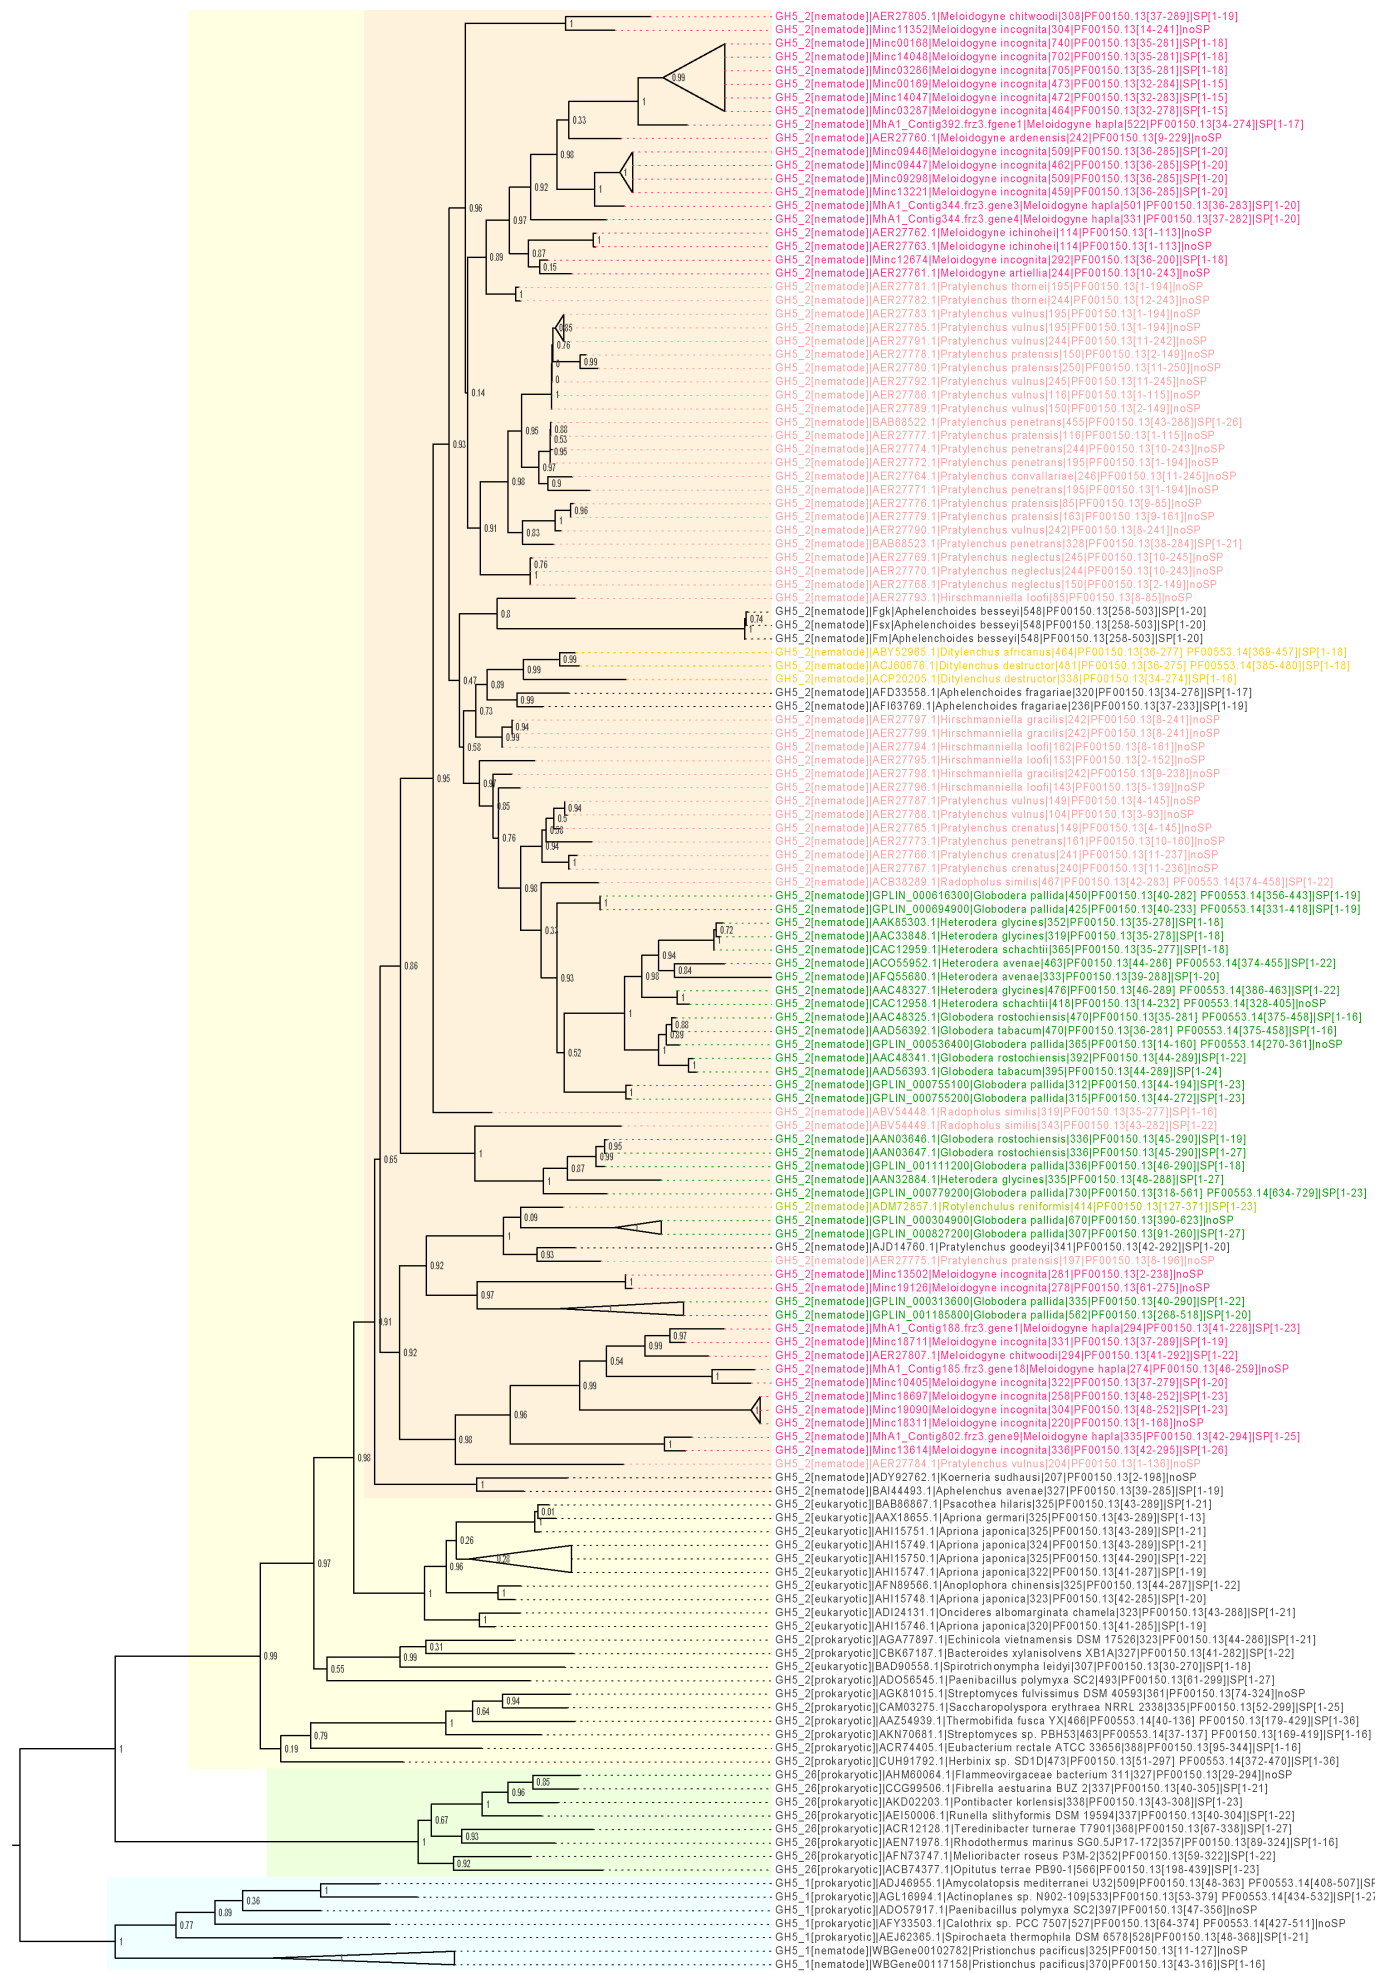

**S5 Fig. Full phylogeny of GH5 orthologues.** Fields in taxa names include: subfamily of GH5, protein sequence id, specie, sequence length (aa), pfam domain composition, and signal peptide information. Part of the taxa were colored by the rules proposed by Katarzyna Rybarczyk-Mydłowska et al. [1]. For gene structure of our *Aphelenchoides besseyi* *Abe GH5-1* gene, please refer to Fig 6.

**Reference:**

- 1. Rybarczyk-Mydłowska K, Maboreke HR, van Megen H, van den Elsen S, Mooyman P, Smant G, et al. Rather than by direct acquisition via lateral gene transfer, GHF5 cellulases were passed on from early Pratylenchidae to root-knot and cyst nematodes. BMC evolutionary biology. 2012;12(1):221.**
