# Supplementary material for: Glycoside Hydrolase (GH) 45 and 5 Candidate Cellulases in Aphelenchoides besseyi Isolated from Bird’s-Nest Fern
Source: PubMed Central journal article supplement (PMC4938546; doi:10.1371/journal.pone.0158663), 2016-07-08
Supplement: pone.0158663.s006.pdf [file pone.0158663.s006.pdf]

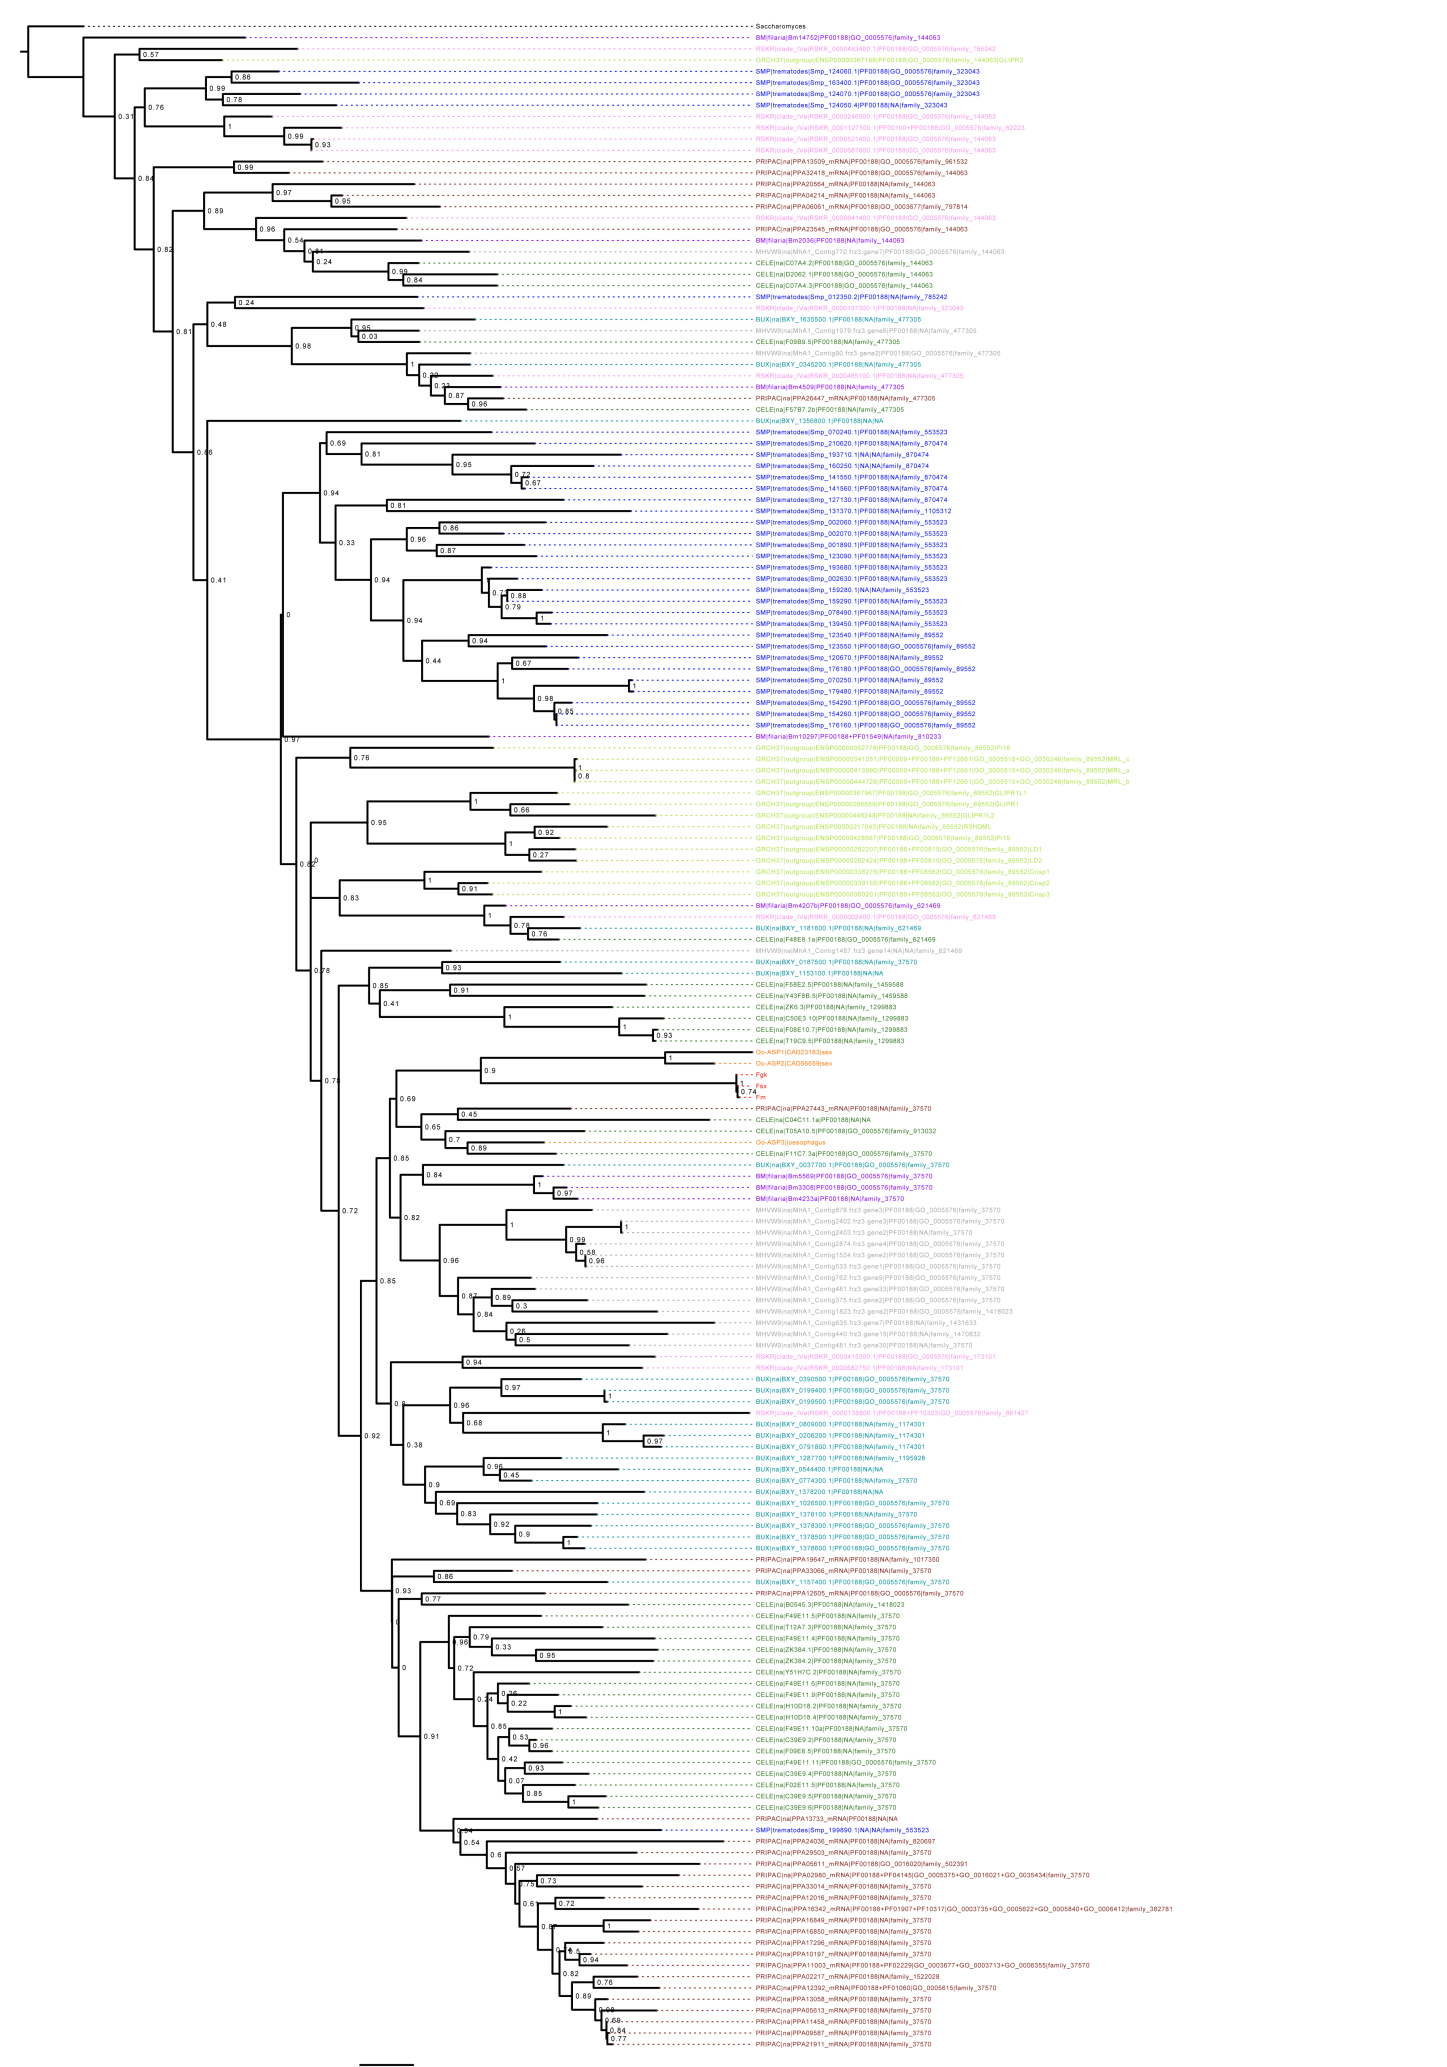

**S6 Fig. A maximum likelihood phylogeny of SCP proteins.** Our sequence of *Aphelenchoides besseyi* are labeled in red, and those of *Ostertagia ostertagi*, including Oo-ASP1 to Oo-ASP3, are labeled in orange. The phylogeny shows that our *A. besseyi* GH5-1 proteins and the orthologues expressed in reproductive organs of *O. ostertagi* are clustered with a high bootstrap value (0.9). The other species in this phylogeny include PRIPAC (*Pristionchus pacificus*), BM (*Brugia malayi*), RSKR (*Rhabditophanes* sp. kr3021), MHVW9 (*Meloidogyne hapla*), BUX (*Bursaphelenchus xylophilus*), GRCH37 (*Homo sapiens*), CELE (*Caenorhabditis elegans*), and SMP (*Schistosoma mansoni*). The name fields include specie, family, sequence id, pfam domain, gene ontology terms, and protein classification. The sequences were aligned using MAFFT (v7.271, options –localpair –maxiterate 1,000 –bl 30 [1]). The alignment was then trimmed with TrimAL (v1.2, options –gt0.12 –w 5 [2]). The phylogeny was then computed using FastTree (version 2.1.7 SSE3 [3]) with models of Wag and GAMMA

#### Reference:

1. Katoh K, Standley DM. MAFFT multiple sequence alignment software version 7: improvements in performance and usability. *Mol Biol Evol.* 2013;30(4):772-80. doi: 10.1093/molbev/mst010. PubMed PMID: 23329690; PubMed Central PMCID: PMC3603318.
2. Capella-Gutierrez S, Silla-Martinez JM, Gabaldon T. trimAl: a tool for automated alignment trimming in large-scale phylogenetic analyses. *Bioinformatics.* 2009;25(15):1972-3. doi: 10.1093/bioinformatics/btp348. PubMed PMID: 19505945; PubMed Central PMCID: PMC2712344.
3. Price MN, Dehal PS, Arkin AP. FastTree 2—approximately maximum-likelihood trees for large alignments. *PloS one.* 2010;5(3):e9490.
