# Supplementary material for: Glycoside Hydrolase (GH) 45 and 5 Candidate Cellulases in Aphelenchoides besseyi Isolated from Bird’s-Nest Fern
Source: PubMed Central journal article supplement (PMC4938546; doi:10.1371/journal.pone.0158663), 2016-07-08
Supplement: pone.0158663.s007.pdf [file pone.0158663.s007.pdf]

**S1 Table. Primers used to amplify *Aphelenchoides besseyi* cDNA and genomic DNA\*.**

| Primer           | Sequence (5' → 3')                | Description             |
|------------------|-----------------------------------|-------------------------|
| 988F             | CTCAAAGATTAAGCCATGC               | 18S [1]                 |
| 1912R            | TTTACGGTCAGAACTAGGG               |                         |
| M-1813F          | CTGCGCGAGAGGTGAAAT                |                         |
| M-2646R          | ACCTACTGATACCTTGTTACGACTTTT       | 18S (modified from [1]) |
| ENG-1            | TAYGTIATHGTIGAYTGGCA              | Fragment amplification  |
| ENG-2            | GTICCRTAYTCIGTIACRAA              |                         |
| GH45 ENG-1       | ACIMGITAYTGGGAYTGYTG              | Fragment amplification  |
| GH45 ENG-2       | RCAICCRTTRAAIADICCIAC             |                         |
| Abe GH5-1-F      | TGAAGTGAAC TTTGGCAAGAAATGAAAATC   | cDNA amplification      |
| Abe GH5-1-R      | GACTGATCATT TTAACGAGCTTAACAAC T G |                         |
| Abe GH45-2-F     | CCAACAAAATGGTTCAATTCATT           | cDNA amplification      |
| Abe GH45-2-R     | CGTTTCAACAATGACATTGTACTCTT        |                         |
| Abe GH45-3-F     | CCAACAAAAATGGTTCAATTCATC          | cDNA amplification      |
| Abe GH45-3-R     | GTTATTA ACTGTCTGCACGAA            |                         |
| FmGH5i-F         | TCGCAATACAATCCTCAGAAG             | Inverse PCR             |
| FmGH5i-R         | GAGTTTAAGCGTCGATAGAAGATG          |                         |
| AbeFm-GH5-GSP-F  | TACGTGATTGTTGATTGGCACGGAA         | 3'RACE                  |
| AbeFm-GH5-NGSP-F | CGATACCCCAATTGAAAGTCCGATT         |                         |
| AbeFm-GH5-GSP-R  | CCATTGGCGCATAGCATTGTAAA           | 5'RACE                  |
| AbeFm-GH45-GSP-F | TATTGGGACTGCTGCAAACCATCTT         | 3'RACE                  |
| AbeFm-GH45-GSP-R | TCCGCCGGTATTGGTAACTTGAAC          | 5'RACE                  |
| AbeRI-GH45-GSP-F | GCCGTATTGGGACTGTTGCAAG            | 3'RACE                  |
| AbeRI-GH45-GSP-R | GCAGCCGTTGAACAAGCC                | 5'RACE                  |

|                     |                                                          |                              |
|---------------------|----------------------------------------------------------|------------------------------|
| AUAP                | GGCCACGCGTCGACTAGTAC                                     | 3'RACE and 5'RACE            |
| Abe GH5-1-S-F       | ATGCGAACCTCAGTGGGGTTT                                    | Southern blot                |
| Abe GH5-1-S-R       | GTTCCGTATTCGGTTACAAATAAAG                                |                              |
| Abe GH5-1-ISH-F     | TTCCACAATATGATGATACTACTCCAA                              | <i>In situ</i> hybridization |
| Abe GH5-1-ISH-R     | GATCATTTTAACGAGCTTAACAACCTG                              |                              |
| T7- Abe GH5-1-ISH-F | <u>TAATACGACTCACTATAGGGT</u> TTCCACAATATGATGATACTACTCCAA |                              |
| T7- Abe GH5-1-ISH-R | <u>TAATACGACTCACTATAGGGG</u> GATCATTTTAACGAGCTTAACAACCTG |                              |

---

\*The T7-promoter sequence to prepare DNA template for *in vitro* transcription is underlined.

#### Refernece:

1. Holterman M, van der Wurff A, van den Elsen S, van Megen H, Bongers T, Holovachov O, et al. Phylum-wide analysis of SSU rDNA reveals deep phylogenetic relationships among nematodes and accelerated evolution toward crown Clades. *Mol Biol Evol.* 2006;23(9):1792-800. doi: 10.1093/molbev/msl044. PubMed PMID: 16790472.
